# Supplementary material
Source: PubMed Central journal article supplement (PMC2705016)
Supplement: pp.109.138214_2.pdf [file pp.109.138214_2.pdf]

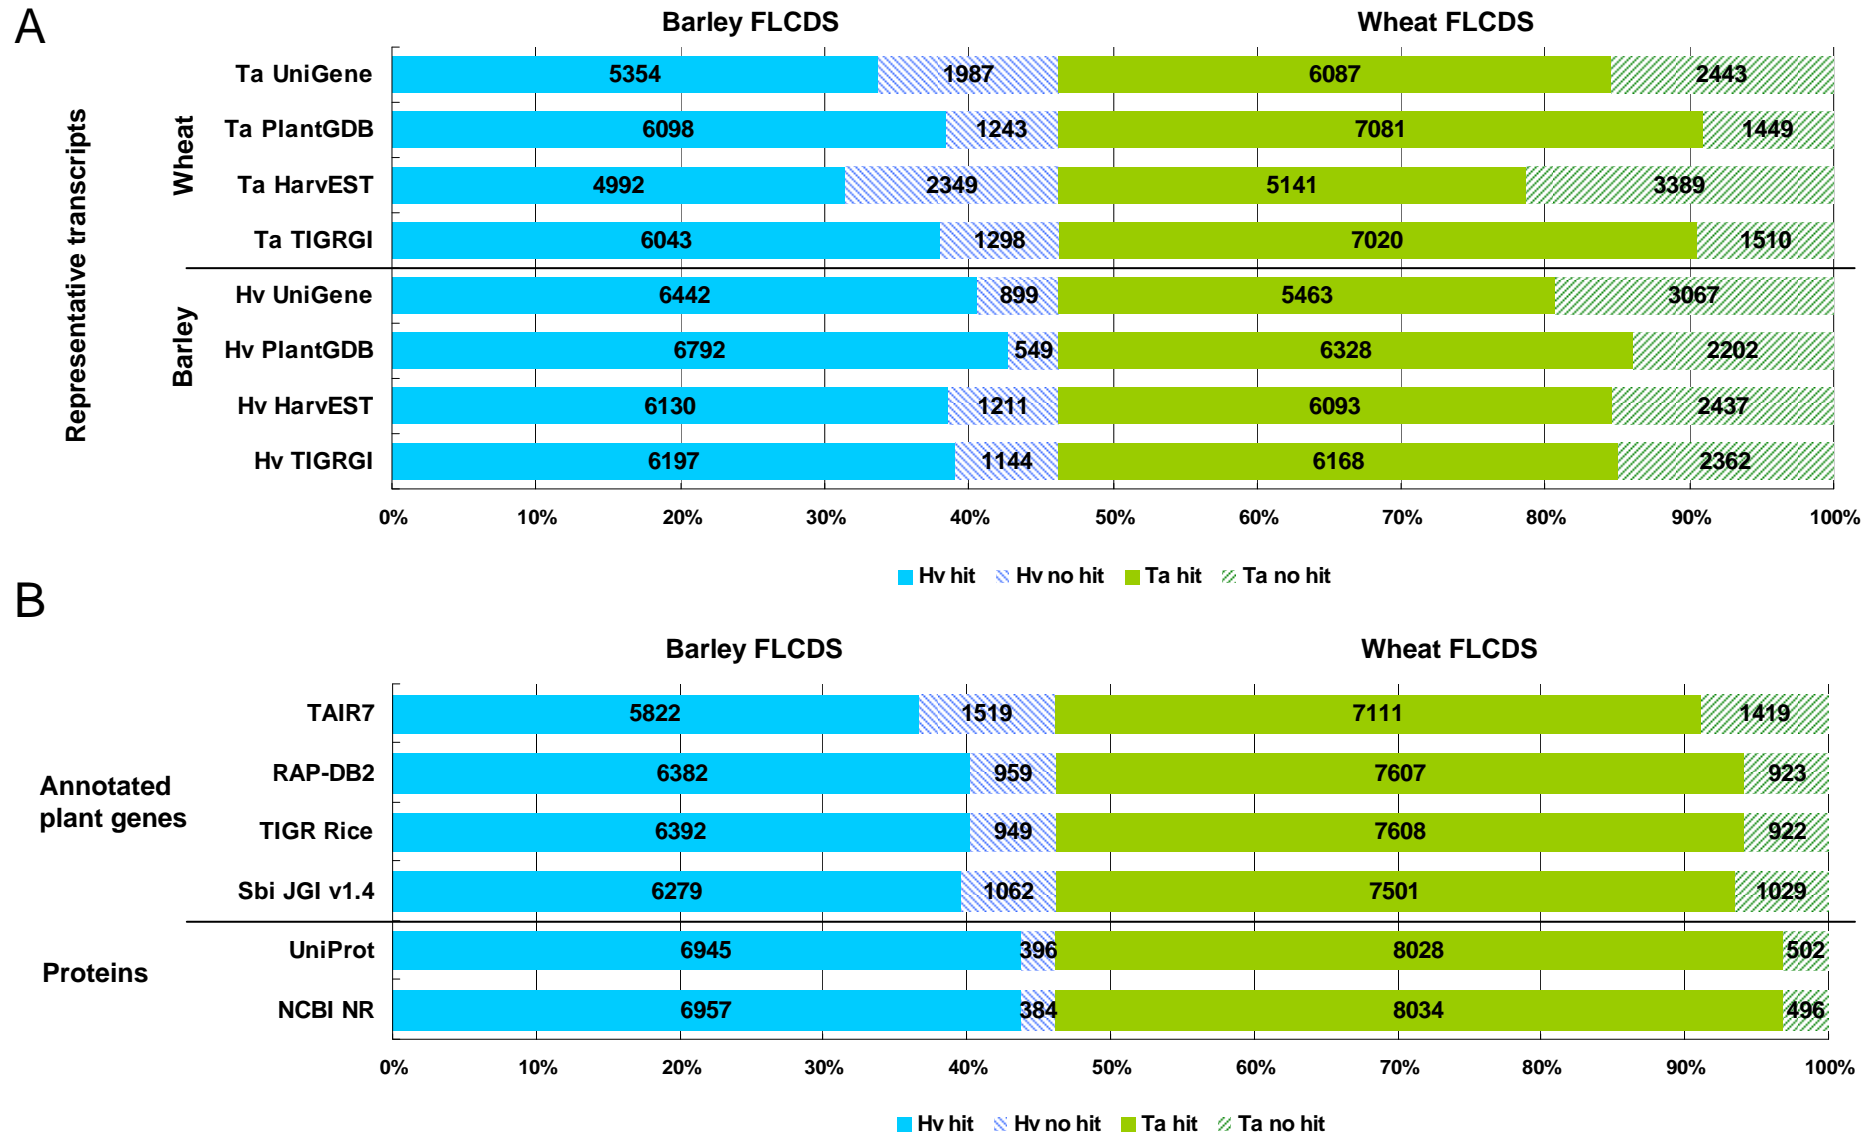

**Supplemental Figure S2.** Summarized results of similarity-search-based annotation of TriFLCDs against various sequence resources provided in public domains. To assign TriFLCDs (TaCDS and HvCDS) representative transcripts of wheat (Ta) and barley (Hv), we used a BLASTN similarity search of the nucleotide sequence data set of NCBI UniGene, PlantGDB, HarvEST, and TIGR Gene Index for wheat and barley (A). To provide potential clues to the gene function of TriFLCDs, the sequences were queried against annotated plant protein sequences of *Arabidopsis*, rice, and sorghum, as well as against the data from typical protein sequence repositories (NCBI nr and UniProt of EBI), by using BLASTX (B).
