# Supplementary material
Source: PubMed Central journal article supplement (PMC2705016)
Supplement: pp.109.138214_3.pdf [file pp.109.138214_3.pdf]

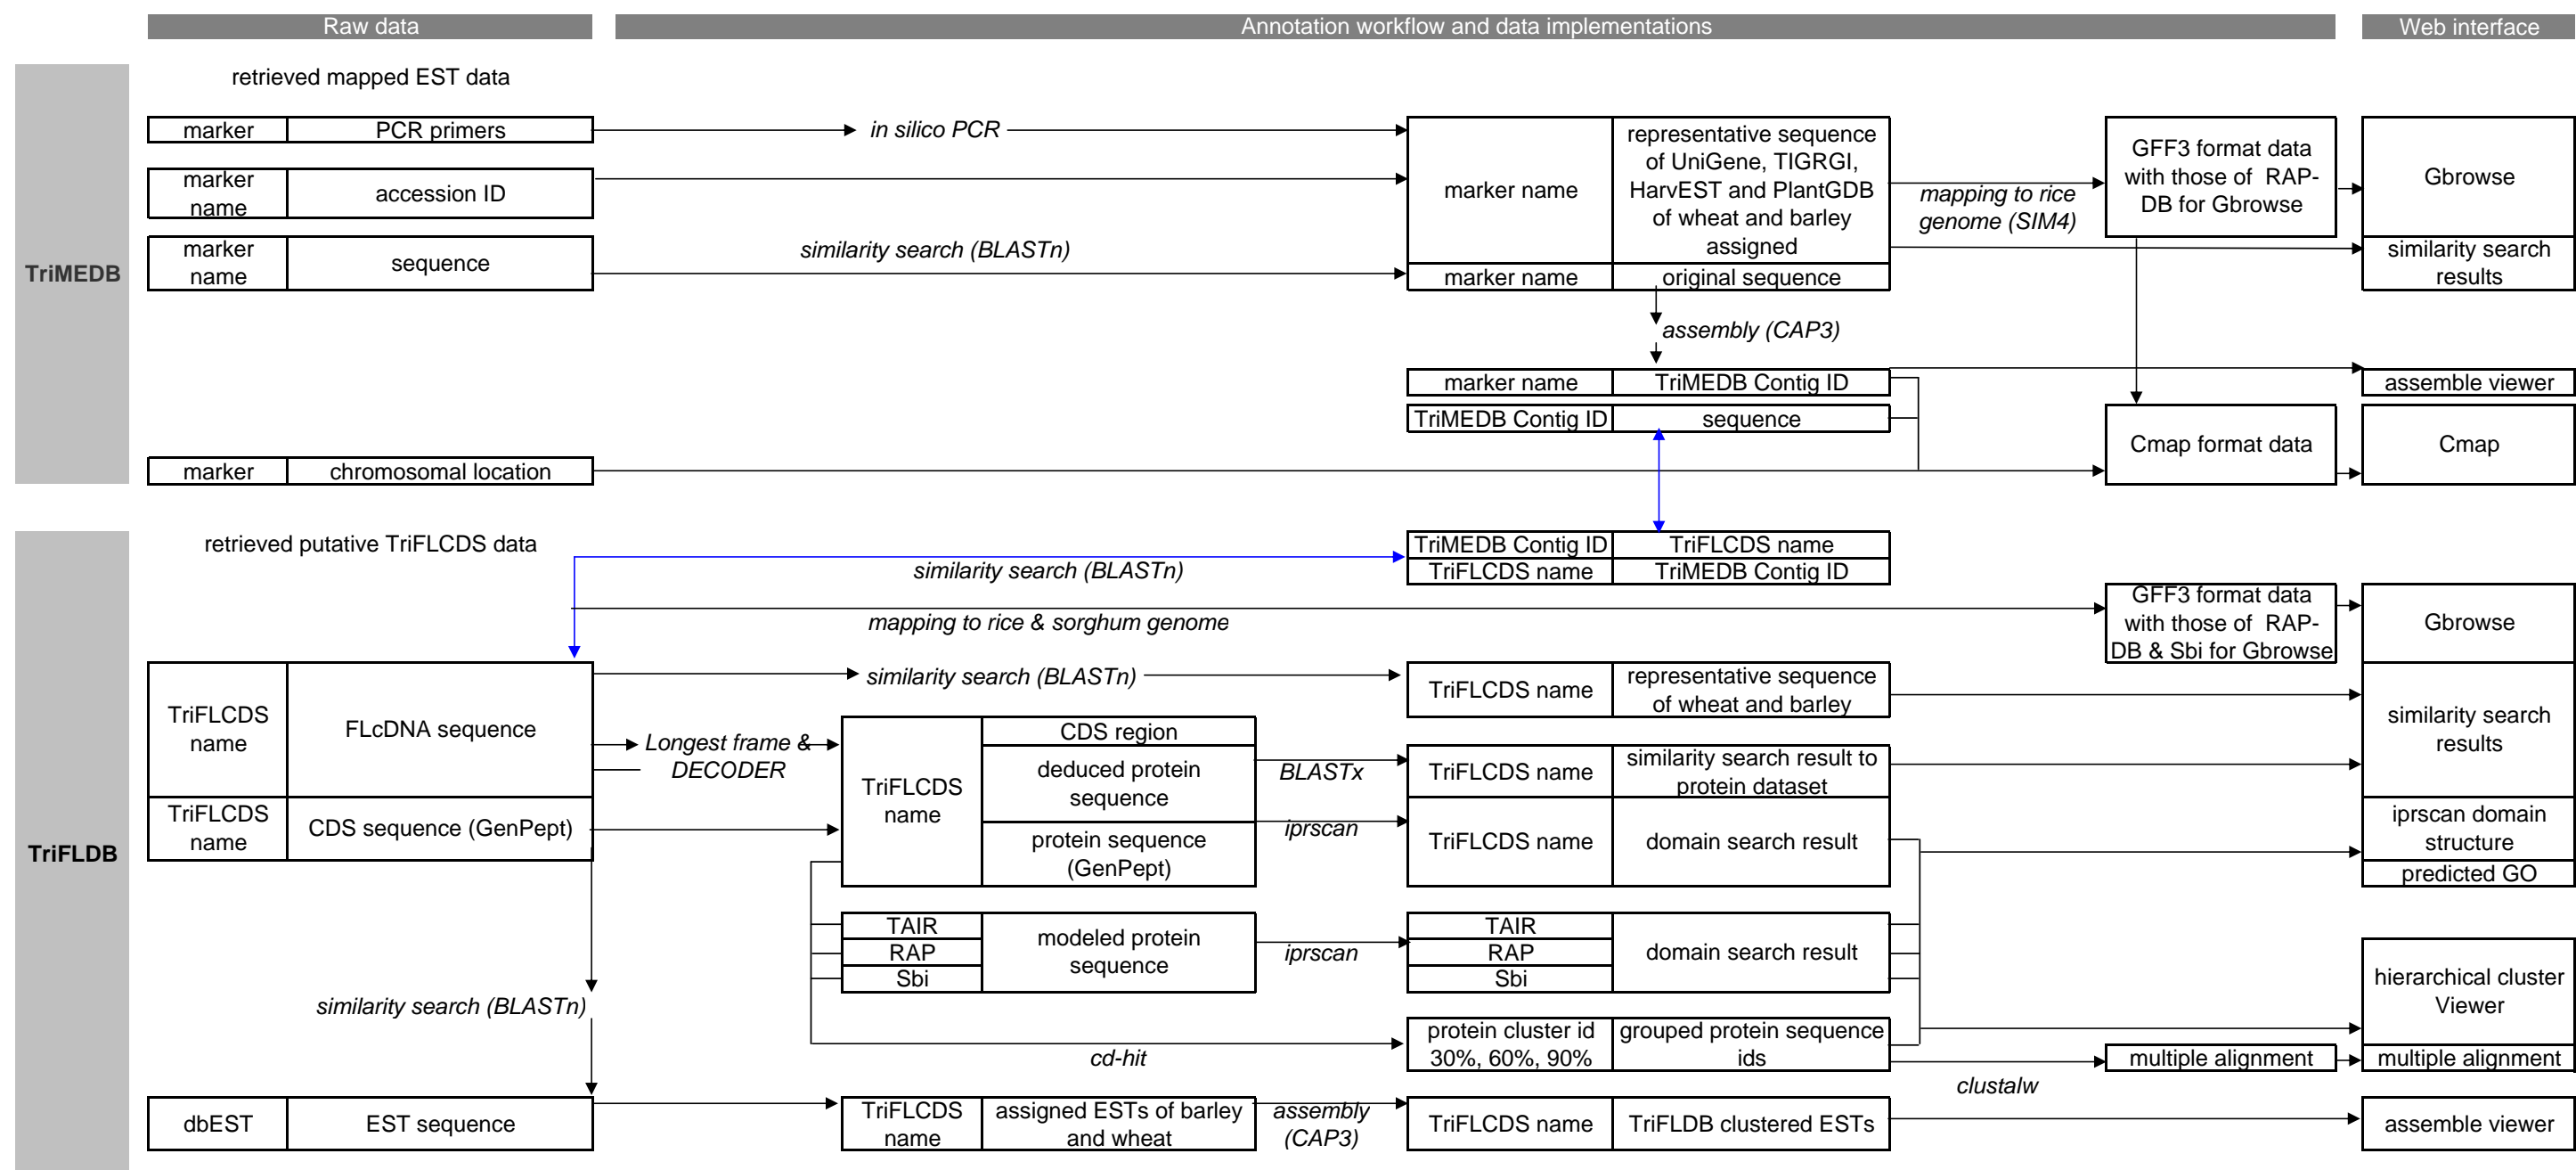

**Supplemental Figure S3.** A schematic diagram of the database structure of TriFLDB together with that of TriMEDB. The upper part is basically the same as presented in supplemental Fig s2 of Mochida et al. (2008), who investigated TriMEDB. The current version of TriFLDB and its relationship with TriMEDB (blue arrows) are depicted in the diagram showing the data handling and generated relational tables of the datasets with the corresponding web interfaces.
