# Supplementary material
Source: PubMed Central journal article supplement (PMC2705016)
Supplement: pp.109.138214_4.pdf [file pp.109.138214_4.pdf]

**Supplemental Table S1.** Distribution of deduced peptide sequences of TriFLCDS with proteome data of *Arabidopsis*, rice, and sorghum hierarchically clustered by threshold of amino acid identity. Ath, Osa and Sbi are corresponding to the modeled proteome dataset of *Arabidopsis* from TAIR (v. 7), rice from RAP-DB (v. 2) and sorghum from JGI (v.1.4) respectively.

| Sequence type                       | Identity (%)    |         |         |        |        |        |        |        |
|-------------------------------------|-----------------|---------|---------|--------|--------|--------|--------|--------|
|                                     | 100             | 90      | 80      | 70     | 60     | 50     | 40     | 30     |
|                                     | No. of clusters |         |         |        |        |        |        |        |
| TriFLCDS<br>and Ath and Osa and Sbi | 9               | 419     | 1,178   | 1,573  | 1,771  | 1,911  | 1,939  | 1,916  |
| TaCDS and (Ath or Osa or Sbi)       | 2               | 383     | 1,640   | 2,514  | 2,851  | 2,823  | 2,714  | 2,179  |
| HvCDS and (Ath or Osa or<br>Sbi)    | 7               | 401     | 1,119   | 1,560  | 1,703  | 1,654  | 1,563  | 1,253  |
| TaCDS                               | 7,865           | 4,929   | 3,278   | 2,136  | 1,520  | 1,161  | 912    | 690    |
| HvCDS                               | 6,018           | 3,334   | 2,176   | 1,468  | 1,042  | 804    | 647    | 528    |
| TaCDS or HvCDS                      | 94              | 1,173   | 618     | 307    | 186    | 108    | 61     | 24     |
| Total with TriFLCDS-specific        | 13,977          | 9,436   | 6,072   | 3,911  | 2,748  | 2,073  | 1,620  | 1,242  |
| Total with TriFLCDS                 | 13,995          | 10,639  | 10,009  | 9,558  | 9,073  | 8,461  | 7,836  | 6,590  |
| Ath or Osa or Sbi                   | 116,868         | 104,812 | 90,448  | 76,251 | 63,105 | 50,632 | 38,915 | 24,147 |
| Total                               | 130,863         | 115,451 | 100,457 | 85,809 | 72,178 | 59,093 | 46,751 | 30,737 |
