# Supplementary material
Source: PubMed Central journal article supplement (PMC2705016)
Supplement: pp.109.138214_5.pdf [file pp.109.138214_5.pdf]

**Supplemental Table S2.** Summarized results of mapping of similarity between TriFLCDS and the rice and sorghum genome sequences.

|                                              | Wheat        | Barley       | Total         |
|----------------------------------------------|--------------|--------------|---------------|
| No. of TriFLCDS entries                      | 8,530        | 7,341        | 15,871        |
| Hits on plant organelle genome* (subtracted) | 205          | 138          | 343           |
| No. of queried sequences                     | 8,325        | 7,203        | 15,528        |
| <b>Rice</b>                                  |              |              |               |
| Mapped to annotated region                   | 6,731        | 5,634        | 12,365        |
| Mapped to non-annotated region               | 71           | 50           | 121           |
| Mapped (%)                                   | 6,802 (81.7) | 5,684 (78.9) | 12,486 (80.4) |
| <b>Sorghum</b>                               |              |              |               |
| Mapped to annotated region                   | 6,559        | 5,506        | 12,065        |
| Mapped to non-annotated region               | 89           | 88           | 177           |
| Mapped (%)                                   | 6,648 (79.9) | 5,594 (77.7) | 12,242 (78.8) |

\* DNA sequences of plant organelle genomes were retrieved from GenBank (Release 165.0) and used to filter homologous TriFLCDS entries.

Values in parentheses indicate percentage relative to total number of queried sequences.
